# Supplementary material
Source: publisher figshare collection journal article supplement (https://sage.figshare.com/ndownloader/files/13771121)
Supplement: Supplementary file 1 [file 13771121]

## Appendix A

The following tables present the average participation rate, the average break-off rate, the average proportion of surveys answered using smartphone and the proportion of respondents with an average rating of four or more stars for younger and older Millennials. Younger Millennials are considered those born between 2003 and 1994, and older Millennials between 1993 and 1982. Within each country, we use two-sample T-tests to compare averages and Z-tests to compare proportions. Since we use a large sample, even small differences can be statistically significant. Hence, to analyze if differences are meaningful, we also compute and report the effect sizes (Cohen's  $h$ ).

**Table 1: Average participation rate (in %)**

| Country   | N       | Younger<br>Millennial | Older<br>Millennial | Cohen's $h$<br>Younger-Older<br>Millennial |
|-----------|---------|-----------------------|---------------------|--------------------------------------------|
| Portugal  | 21,870  | 59.8*                 | 69.9                | .21                                        |
| Spain     | 80,038  | 53.4*                 | 66.3                | .26                                        |
| Argentina | 157,413 | 57.2*                 | 60.6                | .07                                        |
| Brazil    | 290,547 | 49.9*                 | 55.1                | .10                                        |
| Chile     | 161,705 | 52.3*                 | 57.9                | .11                                        |
| Colombia  | 120,524 | 53.9*                 | 56.2                | .05                                        |
| Mexico    | 205,084 | 49.4*                 | 58.4                | .18                                        |
| US        | 49,716  | 33.1*                 | 40.1                | .15                                        |

*Note:* the stars in the columns “Younger Millennial” indicate a significant difference between Younger and Older millennials. \*  $p < .01$

**Table 2: Average break-off rates (in %)**

| Country   | N       | Younger<br>Millennial | Older<br>Millennial | Cohen's $h$<br>Younger-Older<br>Millennial |
|-----------|---------|-----------------------|---------------------|--------------------------------------------|
| Portugal  | 21,870  | 11.6*                 | 13.0                | .04                                        |
| Spain     | 80,038  | 15.1                  | 15.3                | .01                                        |
| Argentina | 157,413 | 15.5*                 | 17.5                | .05                                        |
| Brazil    | 290,547 | 18.0*                 | 18.9                | .02                                        |
| Chile     | 161,705 | 18.4*                 | 21.2                | .07                                        |
| Colombia  | 120,524 | 14.3*                 | 16.7                | .07                                        |
| Mexico    | 205,084 | 14.5*                 | 16.4                | .05                                        |

|    |        |      |      |     |
|----|--------|------|------|-----|
| US | 49,716 | 7.4* | 11.7 | .15 |
|----|--------|------|------|-----|

*Note:* the stars in the columns “Younger Millennial” indicate a significant difference between Younger and Older millennials. \*  $p < .01$

**Table 3: Average proportion of surveys answered using smartphones (in %)**

| Country   | N       | Younger Millennial | Older Millennial | Cohen's h<br>Younger-Older Millennial |
|-----------|---------|--------------------|------------------|---------------------------------------|
| Portugal  | 21,870  | 61.4*              | 51.7             | .20                                   |
| Spain     | 80,038  | 66.6*              | 62.7             | .08                                   |
| Argentina | 157,413 | 80.4*              | 74.1             | .15                                   |
| Brazil    | 290,547 | 76.0*              | 72.6             | .08                                   |
| Chile     | 161,705 | 73.7*              | 69.5             | .09                                   |
| Colombia  | 120,524 | 61.9*              | 58.1             | .08                                   |
| Mexico    | 205,084 | 75.9*              | 68.2             | .17                                   |
| US        | 49,716  | 81.4*              | 76.1             | .13                                   |

*Note:* the stars in the columns “Younger Millennial” indicate a significant difference between Younger and Older millennials. \*  $p < .01$

**Table 4: Proportion of respondents with an average rating of four or more stars**

| Country   | N      | Younger Millennial | Older Millennial | Cohen's h<br>Younger-Older Millennial |
|-----------|--------|--------------------|------------------|---------------------------------------|
| Portugal  | 6,628  | 68.7*              | 72.5             | .08                                   |
| Spain     | 62,055 | 56.6*              | 58.1             | .03                                   |
| Argentina | 34,662 | 73.3*              | 68.7             | .10                                   |
| Brazil    | 63,181 | 85.1*              | 81.7             | .09                                   |
| Chile     | 49,861 | 79.9*              | 78.5             | .03                                   |
| Colombia  | 31,044 | 85.7*              | 82.7             | .08                                   |
| Mexico    | 76,653 | 83.8               | 83.4             | .01                                   |
| US        | 8,945  | 84.4*              | 87.6             | .09                                   |

*Note:* the stars in the columns “Younger Millennial” indicate a significant difference between Younger and Older millennials. \*  $p < .01$
